# Supplementary material for: A needle-like optofluidic probe enables targeted intracellular delivery by confining light-nanoparticle interaction on single cell
Source: Royal Society of Chemistry journal article supplement (doi:10.1039/c8nr03895c), 2018-01-01
Supplement: c8nr03895c1.pdf [file c8nr03895c1.pdf]

## A needle-like optofluidic probe enables targeted intracellular delivery by confining light-nanoparticle interaction on single cell

Andrew Doppenberg<sup>a,b</sup>, Michel Meunier<sup>c</sup> and Christos Boutopoulos<sup>\*a,d,e</sup>

<sup>a</sup>Maisonneuve-Rosemont Hospital Research Centre, Montreal, Quebec, Canada.

<sup>b</sup>Faculty of Applied Science, University of British Columbia, Vancouver, British Columbia, Canada.

<sup>c</sup>Laser Processing and Plasmonics Laboratory, Polytechnique Montréal, Montreal, Quebec, Canada

<sup>d</sup>Department of Ophthalmology, University of Montreal, Montreal, Quebec, Canada

Institute of Biomedical Engineering, University of Montreal, Montreal, Quebec, Canada

\*Email: christos.boutopoulos@umontreal.ca

### Supplementary material

#### 1. Quantification of apoptotic and necrotic cells

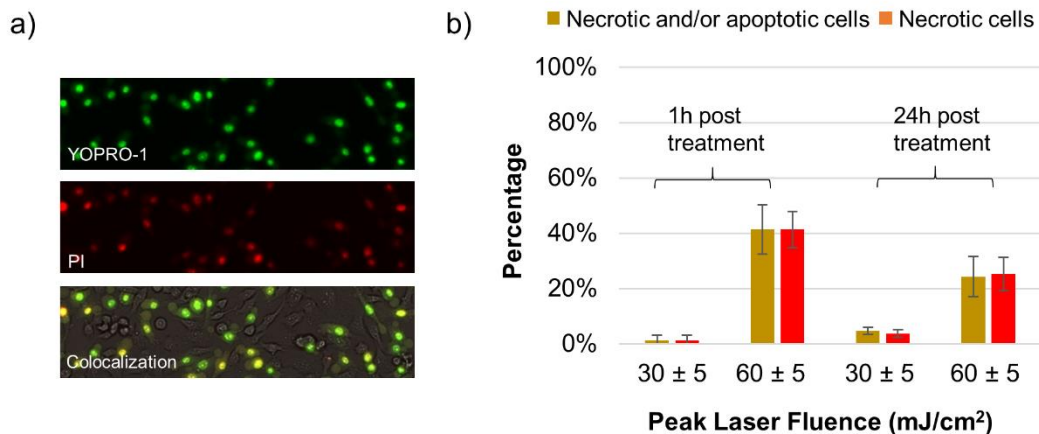

**Figure S1** (a) Fluorescence microscopy images of MDA-MB-231 cells irradiated with an optofluidic probe at 60 mJ/cm<sup>2</sup>. Green staining (YOPRO-1) indicates necrotic and/or apoptotic cells and red staining (PI) indicates necrotic cells only. Quantification of apoptotic and/or necrotic and necrotic only cells for various laser treatment energy fluences and monitoring time frames.
